# Supplementary material
Source: Springer Nature journal article supplement (https://www.springermedizin.de/resource/supplementary/12891_2009_796_MOESM1_ESM.pdf/9507036)
Supplement: MOESM1 [file 9507036]

## Ovid MEDLINE® 1966 to July Week 3 2006

| #  | Search History                        | Results |
|----|---------------------------------------|---------|
| 1  | exp Arthritis, Rheumatoid/di          | 9443    |
| 2  | exp spondylarthritis/di               | 2294    |
| 3  | (inflammatory adj1 arthritis).tw.     | 1406    |
| 4  | (undifferentiated adj2 arthritis).tw. | 136     |
| 5  | 1 or 2 or 3 or 4                      | 11655   |
| 6  | early diagnosis/                      | 1484    |
| 7  | mass screening/                       | 52394   |
| 8  | questionnaires                        | 144006  |
| 9  | exp "referral and consultation"/      | 39176   |
| 10 | screen\$.tw.                          | 239562  |
| 11 | 6 or 7 or 8 or 9 or 10                | 428884  |
| 12 | 5 and 11                              | 584     |
